# Supplementary material for: ProteinVR: Web-based molecular visualization in virtual reality
Source: PubMed Central journal article supplement (PMC7147804; doi:10.1371/journal.pcbi.1007747), 2020-03-31
Supplement: pcbi.1007747.s002.pdf [file pcbi.1007747.s002.pdf]

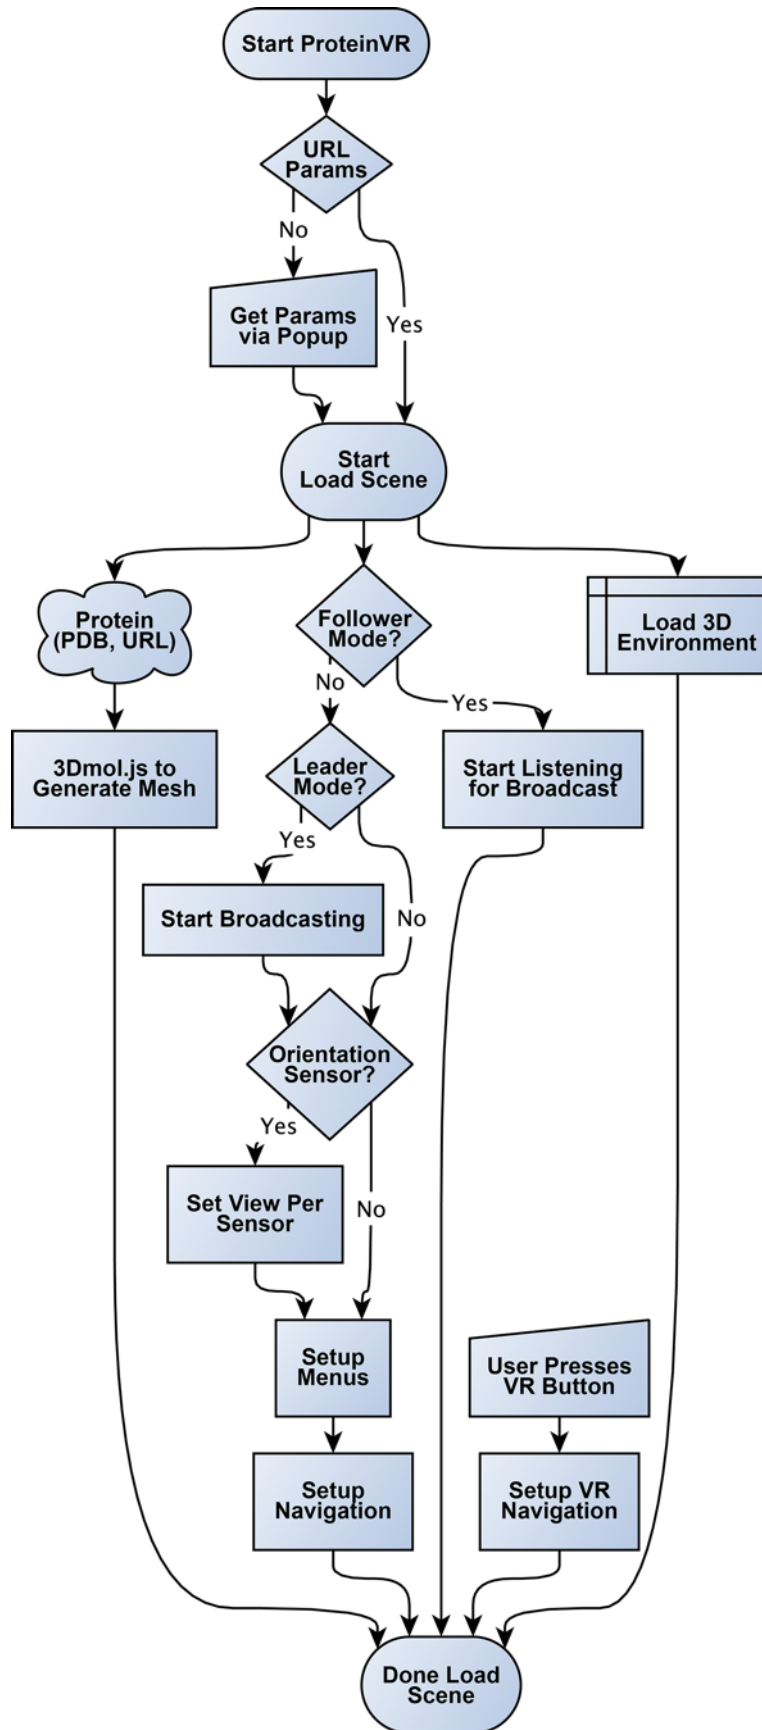

**S1 Fig. Flowchart diagram representing the main steps of the ProteinVR algorithm.** Oval nodes representing starting and stopping points. Diamonds represent decision points. Trapezoids represent points of manual input. The cloud represents data loaded from a remote source. The partitioned rectangle represents data loaded from within the ProteinVR app itself (internal storage). Plain rectangles represent algorithmic process steps.
