# Supplementary material for: ProteinVR: Web-based molecular visualization in virtual reality
Source: PubMed Central journal article supplement (PMC7147804; doi:10.1371/journal.pcbi.1007747), 2020-03-31
Supplement: pcbi.1007747.s003.pdf [file pcbi.1007747.s003.pdf]

**S1 Table. A few of the devices used to test ProteinVR in VR mode, together with the associated hardware specifications.**

| Device Type    | Brand                         | CPU(s)                                                                                                                | GPU(s)                                              | Memory | OS                       |
|----------------|-------------------------------|-----------------------------------------------------------------------------------------------------------------------|-----------------------------------------------------|--------|--------------------------|
| <b>Desktop</b> | Dell Precision 3630 Tower (R) | Intel Core (TM) i7-8700K @ 3.7 GHz, 6 Cores, 12 Threads                                                               | NVIDIA GeForce GTX 1080, Intel (R) UHD Graphics 630 | 16 GB  | Microsoft Windows 10 Pro |
| <b>Mobile</b>  | Samsung Galaxy S10 SM-G973U   | Qualcomm Snapdragon 855: Kryo 485 Dual-Core @ 2.8 GHz, Kryo 485 Dual-Core @ 2.4 GHz, and Kryo 485 Quad-Core @ 1.7 GHz | Adreno 640                                          | 8 GB   | Android 10               |
| <b>Mobile</b>  | iPhone X                      | Apple A11 Bionic Hexa-core @ 2.39 GHz                                                                                 | Apple-Designed 3 Core                               | 3 GB   | iOS 11                   |

ProteinVR is designed to run on a broad range of devices. The information presented in this table should give users a sense for the hardware required, but many lower-powered devices can also run ProteinVR successfully. Using ProteinVR in non-VR mode is even less computationally demanding. We have intentionally omitted VR-specific devices such as the Oculus Quest, as these obviously have the hardware required to run VR.
